# Supplementary material
Source: PubMed Central journal article supplement (PMC1413865)

A

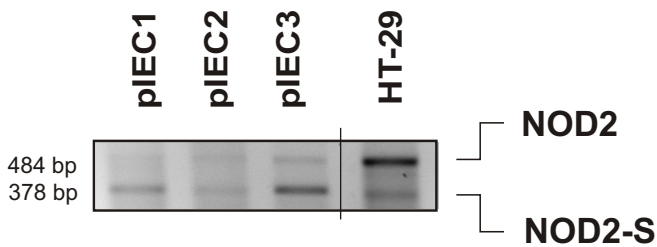

B

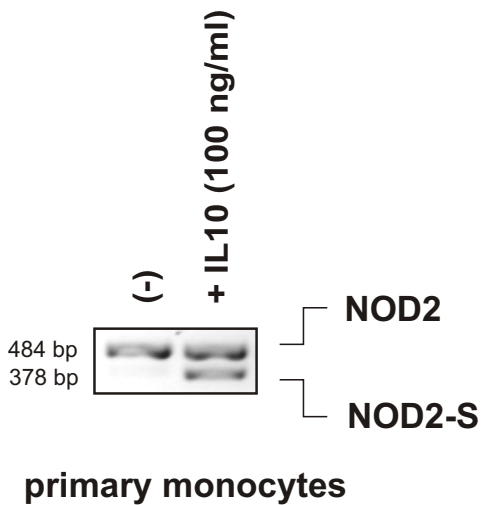

Supplement: pnas_0505423103_1.pdf [file pnas_0505423103_1.pdf]

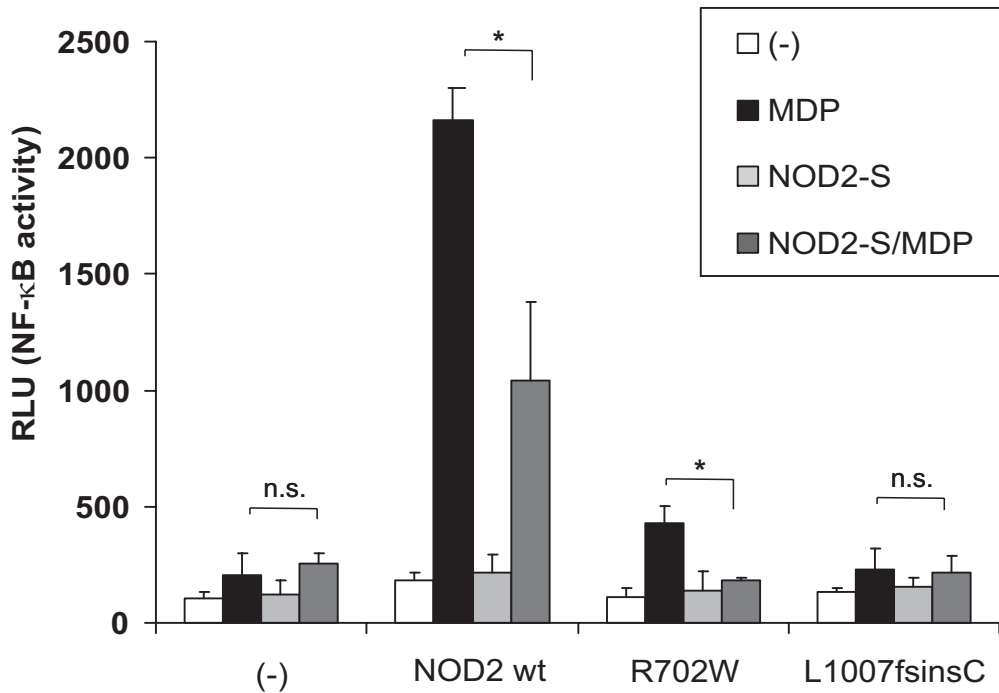

Supplement: pnas_0505423103_2.pdf [file pnas_0505423103_2.pdf]

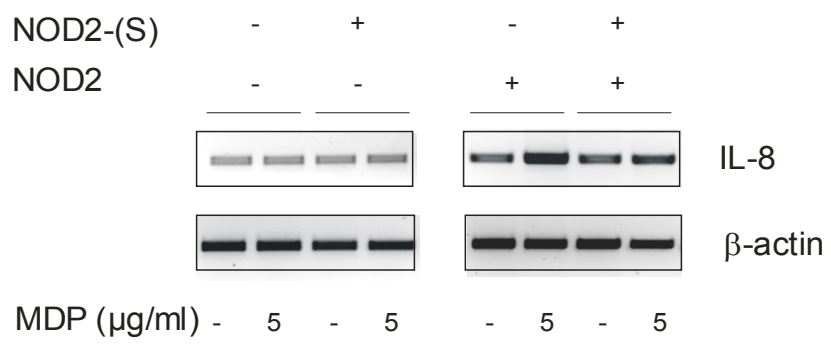

Supplement: pnas_0505423103_3.pdf [file pnas_0505423103_3.pdf]
